# Supplementary material for: Prognostic Value of Mid-Regional Proadrenomedullin Sampled at Presentation and after 72 Hours in Septic Patients Presenting to the Emergency Department: An Observational Two-Center Study
Source: MDPI journal article supplement (doi:10.3390/biomedicines10030719), 2022-03-19

**Prognostic value of mid-regional proadrenomedullin sampled at presentation and after 72 hours, in septic patients presenting to the Emergency Department: an observational two-center study**

## **SUPPLEMENTARY MATERIAL**

**Supplementary Table S1.** Selected characteristics of patients with septic shock.

**Supplementary Table S2.** ROC curve analysis in patients with septic shock. P-values are calculated with respect to SOFA score.

**Supplementary Table S3.** ROC curve analysis in patients with a pulmonary infective focus. P-values are calculated with respect to SOFA score.

**Supplementary Table S4.** Logistic regression analysis.

**Supplementary Table S5.** Logistic regression analysis in patients with septic shock.

**Supplementary Table S6.** Logistic regression analysis in patients with a pulmonary infective focus.

**Supplementary Figure S1.** Flow diagram of the study.

**Supplementary Figure S2.** Dose-response plot for 28-day mortality predicted by MR-proADM<sub>t0</sub> (panel A) and MR-proADM<sub>t72</sub> (panel B) at varying levels of the APACHEII score.

**Supplementary Table S1.** Selected characteristics of patients with septic shock.

|                                                 | <b>Total (N=38)</b>             | <b>Survivors (N=30)</b> | <b>Non-Survivors (N=8)</b> | <b>p-value</b> |
|-------------------------------------------------|---------------------------------|-------------------------|----------------------------|----------------|
| <b>Biomarkers at presentation</b>               |                                 |                         |                            |                |
| MR-pro-ADM (nmol/L)                             | 4.40 (2.14-8.50)                | 4.35 (1.86-7.51)        | 7.83 (2.99-12.2)           | 0.25           |
| PCT (ng/mL)                                     | 13.89 (5.06-77.02)<br>Missing 1 | 12.33 (5.01-77.02)      | 16.82 (4.93-75.85)         | 0.85           |
| Lactate (mmol/L)                                | 3.6 (2.0-5.5)<br>Missing 1      | 3.20 (1.90-5.00)        | 4.95 (2.55-7.55)           | 0.28           |
| CRP (mg/L)                                      | 196 (63-281)                    | 204 (84-284)            | 120 (23-266)               | 0.31           |
| <b>Biomarkers at 72-hours from presentation</b> |                                 |                         |                            |                |
| MR-pro-ADM (nmol/L)                             | 2.94 (1.47-6.48)<br>Missing 2   | 2.31 (1.35-4.50)        | 7.24 (2.93-11.65)          | 0.03           |
| PCT (ng/mL)                                     | 9.20 (2.68-21.70)<br>Missing 9  | 8.10 (1.97-20.78)       | 63.13 (26.26-100)          | 0.11           |
| CRP (mg/L)                                      | 174 (109-248)<br>Missing 4      | 174 (111-284)           | 163 (66-284)               | 0.74           |
| proADM <sub>%change</sub>                       | -19% (-55%, 5%)<br>Missing 2    | -21% (-55%-4%)          | 4% (-14%,21%)              | 0.04           |
| <b>Severity scores at presentation</b>          |                                 |                         |                            |                |
| SOFA score                                      | 6 (6-9)                         | 6 (6-10)                | 6 (6-7)                    | 0.29           |
| APACHE II                                       | 24 (20-33)                      | 23 (20-28)              | 36 (30-40)                 | 0.008          |

**Supplementary Table S2.** ROC curve analysis in patients with septic shock. P-values are calculated with respect to SOFA score.

|                               | <b>28-day Mortality</b> |         |
|-------------------------------|-------------------------|---------|
|                               | AUC (95%CI)             | P-value |
| SOFA                          | 0.39 (0.21-0.57)        | -       |
| APACHEII                      | 0.81 (0.59-1.0)         | 0.006   |
| MR-pro-ADM <sub>t0</sub>      | 0.64 (0.39-0.89)        | 0.05    |
| MR-pro-ADM <sub>t72</sub>     | 0.76 (0.50-1.0)         | 0.005   |
| MR-pro-ADM <sub>%change</sub> | 0.74 (0.58-0.91)        | 0.002   |
| CRP <sub>t0</sub>             | 0.38 (0.11-0.65)        | 0.96    |
| PCT <sub>t0</sub>             | 0.52 (0.28-0.77)        | 0.23    |
| Lactate <sub>t0</sub>         | 0.63 (0.38-0.88)        | 0.008   |

**Supplementary Table S3.** ROC curve analysis in patients with a pulmonary infective focus. P-values are calculated with respect to SOFA score.

|                               | <b>28-day Mortality</b> |         |
|-------------------------------|-------------------------|---------|
|                               | AUC (95%CI)             | P-value |
| SOFA                          | 0.60 (0.38-0.82)        | -       |
| APACHEII                      | 0.76 (0.55-0.97)        | 0.01    |
| MR-pro-ADM <sub>t0</sub>      | 0.56 (0.32-0.79)        | 0.77    |
| MR-pro-ADM <sub>t72</sub>     | 0.70 (0.44-0.96)        | 0.47    |
| MR-pro-ADM <sub>%change</sub> | 0.78 (0.62-0.93)        | 0.19    |
| CRP <sub>t0</sub>             | 0.61 (0.38-0.83)        | 0.92    |
| PCT <sub>t0</sub>             | 0.65 (0.42-0.87)        | 0.65    |
| Lactate <sub>t0</sub>         | 0.67 (0.45-0.89)        | 0.70    |

**Supplementary Table S4.** Logistic regression analysis.

| Variable                                   | Adjustment | OR (95% CI)      | p-value | LR test for added value |
|--------------------------------------------|------------|------------------|---------|-------------------------|
| <b>MR-proADM<sub>t0</sub></b>              | -          | 1.4 (1.1-1.9)    | 0.02    | -                       |
|                                            | age        | 1.6 (1.1-2.3)    | 0.01    | 35.5%                   |
|                                            | SOFA score | 1.3 (0.9-1.8)    | 0.13    | -                       |
|                                            | APACHEII   | 1.12 (0.79-1.57) | 0.53    | -                       |
| <b>MR-proADM<sub>t0</sub> ≥2.78</b>        | -          | 4.4 (1.6-12.5)   | 0.005   | -                       |
|                                            | age        | 4.4 (1.5-12.8)   | 0.008   | 39.4%                   |
|                                            | SOFA score | 3.8 (1.2-11.5)   | 0.02    | 58.1%                   |
|                                            | APACHEII   | 2.1 (0.7-6.6)    | 0.22    | -                       |
| <b>MR-proADM<sub>t72</sub></b>             | -          | 2.0 (1.4-2.9)    | <0.001  | -                       |
|                                            | age        | 2.0 (1.4-3.0)    | <0.001  | 49.0%                   |
|                                            | SOFA score | 2.2 (1.4-3.4)    | <0.001  | 82.8%                   |
|                                            | APACHEII   | 1.6 (1.2-2.3)    | 0.005   | 26.7%                   |
| <b>MR-proADM<sub>t72</sub> ≥2.70</b>       | -          | 6.7 (2.2-20.3)   | <0.001  | -                       |
|                                            | age        | 7.7 (2.4-25.2)   | <0.001  | 37.8%                   |
|                                            | SOFA score | 7.3 (2.1-24.9)   | 0.002   | 71.0%                   |
|                                            | APACHEII   | 3.0 (0.8-10.6)   | 0.09    | -                       |
| <b>MR-proADM<sup>%change</sup></b>         | -          | 34.8 (2.3-526.3) | <0.001  | -                       |
|                                            | age        | 41.4 (2.3-751.3) | <0.001  | 46.3%                   |
|                                            | SOFA score | 52.6 (3.2-853.7) | <0.001  | 84.5%                   |
|                                            | APACHEII   | 55.2 (2.4-1279)  | <0.001  | 38.0%                   |
| <b>MR-proADM<sup>%change</sup> ≥-15.2%</b> | -          | 7.0 (2.1-23.3)   | 0.002   | -                       |
|                                            | age        | 7.1 (2.1-24.2)   | 0.002   | 34.6%                   |
|                                            | SOFA score | 7.9 (2.3-27.2)   | 0.001   | 75.2%                   |
|                                            | APACHEII   | 10.1 (2.5-41.9)  | 0.001   | 32.1%                   |

**Supplementary Table S5.** Logistic regression analysis in patients with septic shock.

| Variable                              | Adjustment | OR (95%CI)       | p-value | LR test for added value |
|---------------------------------------|------------|------------------|---------|-------------------------|
| <b>MR-pro-ADM<sub>t0</sub></b>        | -          | 1.5 (0.7-3.0)    | 0.27    | -                       |
| <b>MR-pro-ADM<sub>t0</sub> ≥ 2.78</b> | -          | 5.4 (0.6-49.1)   | 0.14    | -                       |
| <b>MR-proADM<sub>t72</sub></b>        | -          | 4.2 (1.2-15.5)   | 0.03    | -                       |
|                                       | age        | 4.6 (1.0-21.6)   | 0.05    | -                       |
|                                       | SOFA       | 5.4 (1.2-24.3)   | 0.03    | 78.6%                   |
|                                       | APACHEII   | 5.6 (1.4-22.1)   | 0.01    | 19.9%                   |
| <b>MR-proADM<sub>t72</sub> ≥ 2.7</b>  | -          | 4.0 (0.7-23.4)   | 0.12    | -                       |
| <b>%delta proADM</b>                  | -          | 1.1 (0.7-1.8)    | 0.74    | -                       |
| <b>%delta proADM &gt;- 15.21%</b>     | -          | 6.3 (1.1-37.8)   | 0.04    | -                       |
|                                       | age        | 10.1 (1.2-84.2)  | 0.03    | 37.4%                   |
|                                       | SOFA       | 5.3 (0.9-33.4)   | 0.07    | -                       |
|                                       | APACHEII   | 14.5 (1.3-168.6) | 0.03    | 42.3%                   |

**Supplementary Table S6.** Logistic regression analysis in patients with a pulmonary infective focus.

| Variable                              | Adjustment | OR (95%CI)       | p-value | LR test for added value |
|---------------------------------------|------------|------------------|---------|-------------------------|
| <b>MR-pro-ADM<sub>t0</sub></b>        | -          | 1.4 (0.4-4.4)    | 0.86    | -                       |
| <b>MR-pro-ADM<sub>t0</sub> ≥2.78</b>  | -          | 4.9 (1.1-20.9)   | 0.03    | -                       |
|                                       | age        | 5.9 (1.3-27.4)   | 0.02    | 70.4%                   |
|                                       | SOFA       | 4.4 (0.9-21.0)   | 0.06    | -                       |
|                                       | APACHEII   | 1.8 (0.3-10.2)   | 0.5     | -                       |
| <b>MR-proADM<sub>t72</sub></b>        | -          | 1.5 (1.0-2.3)    | 0.04    | -                       |
|                                       | age        | 1.6 (1.0-2.4)    | 0.04    | 58.4%                   |
|                                       | SOFA       | 1.6 (0.9-2.7)    | 0.07    | -                       |
|                                       | APACHEII   | 1.1 (0.7-1.9)    | 0.7     | -                       |
| <b>MR-proADM<sub>t72</sub> ≥2.7</b>   | -          | 15.0 (2.6-87.6)  | 0.003   | -                       |
|                                       | age        | 24.7 (2.8-217.0) | 0.004   | 81.7%                   |
|                                       | SOFA       | 17.2 (2.4-121.3) | 0.004   | 88.7%                   |
|                                       | APACHEII   | 6.0 (0.76-47.2)  | 0.09    | -                       |
| <b>%delta proADM</b>                  | -          | 37.3 (1.2-1180)  | 0.008   | -                       |
|                                       | age        | 104.9 (1.6-6888) | 0.04    | 81.7%                   |
|                                       | SOFA       | 53.2 (1.5-1936)  | 0.03    | 90.5%                   |
|                                       | APACHEII   | 40.3 (0.7-2441)  | 0.09    | -                       |
| <b>%delta proADM &gt;-<br/>15.21%</b> | -          | 10.3 (1.8-60.3)  | 0.01    | -                       |
|                                       | age        | 15.8 (2.3-107.9) | 0.005   | 37.4%                   |
|                                       | SOFA       | 10.6 (1.8-62.9)  | 0.009   | 87.0%                   |
|                                       | APACHEII   | 16.6 (1.6-171.6) | 0.02    | 51.3%                   |

**Supplementary Figure S1.** Flow diagram of the study.

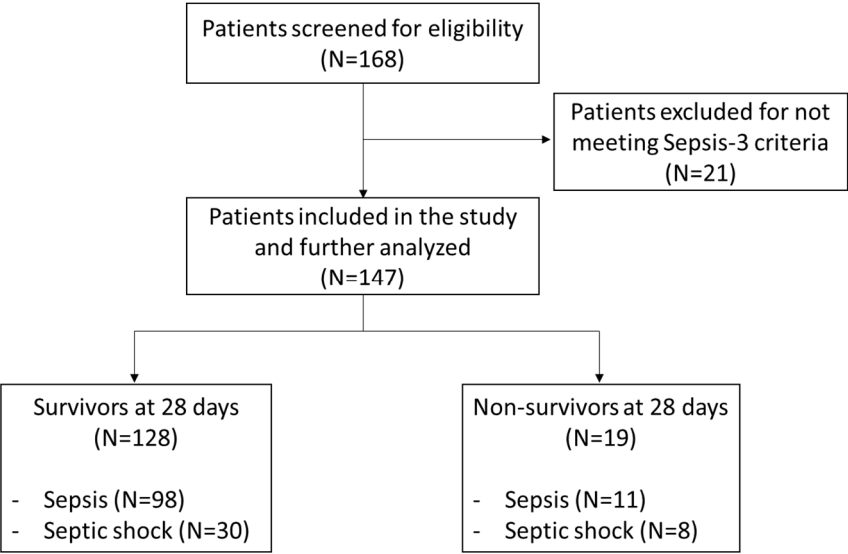



**Supplementary Figure S2.** Dose-response plot for 28-day mortality predicted by MR-proADM<sub>t0</sub> (panel A) and MR-proADM<sub>t72</sub> (panel B) at varying levels of the APACHEII score.

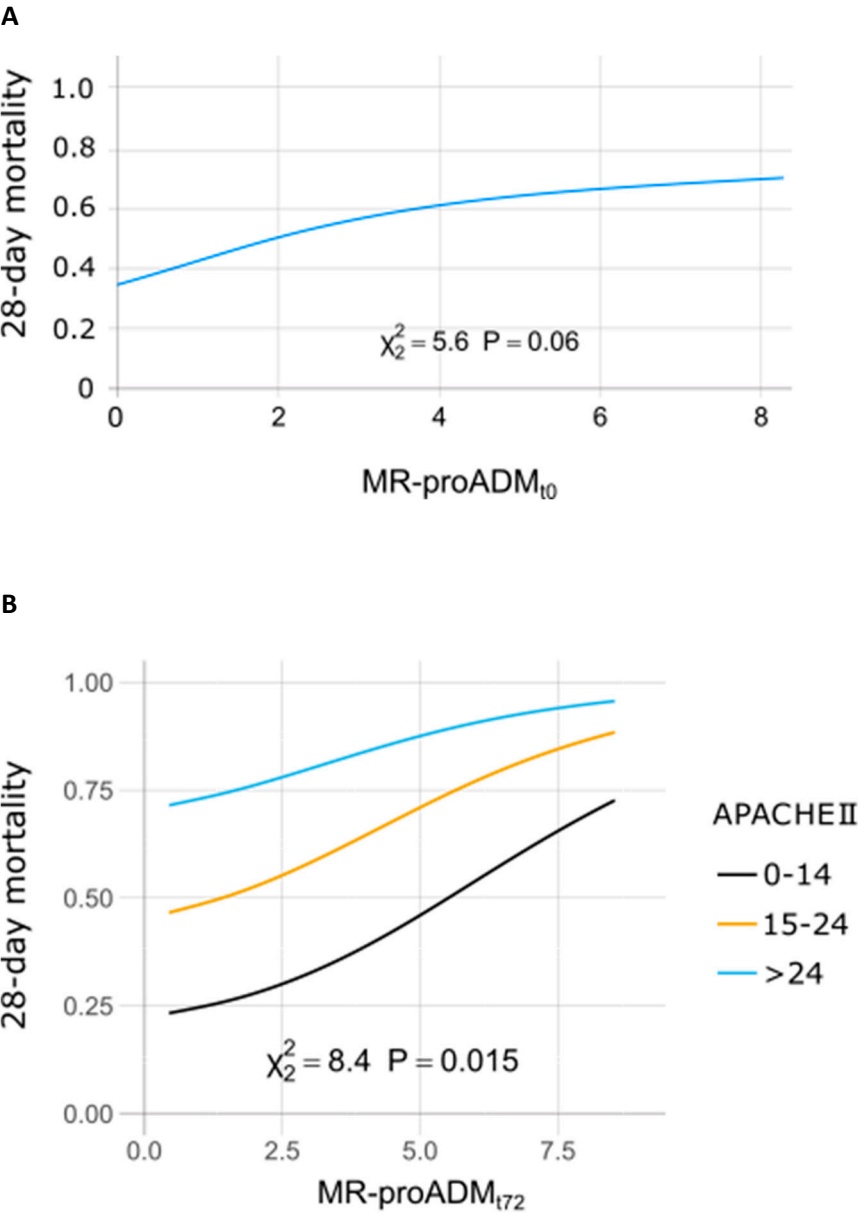

Supplement: s1 [file s1]
